# Supplementary material for: Mechanisms to Evade the Phagocyte Respiratory Burst Arose by Convergent Evolution in Typhoidal Salmonella Serovars
Source: PubMed Central journal article supplement — Cell Rep. Author manuscript; Available in PMC 2018 Feb 26. (PMC5826628; doi:10.1016/j.celrep.2018.01.016), 2018-02-13
Supplement: NIHMS943904-supplement-1.pdf [file NIHMS943904-supplement-1.pdf]

Cell Reports, Volume 22

## Supplemental Information

### **Mechanisms to Evade the Phagocyte Respiratory Burst Arose by Convergent Evolution in Typhoidal *Salmonella* Serovars**

Hiroataka Hiyoshi, Tamding Wangdi, Gabriel Lock, Cheng Saechao, Manuela Raffatellu, Brian A. Cobb, and Andreas J. Bäumlér

**SUPPLEMENTARY DATA**

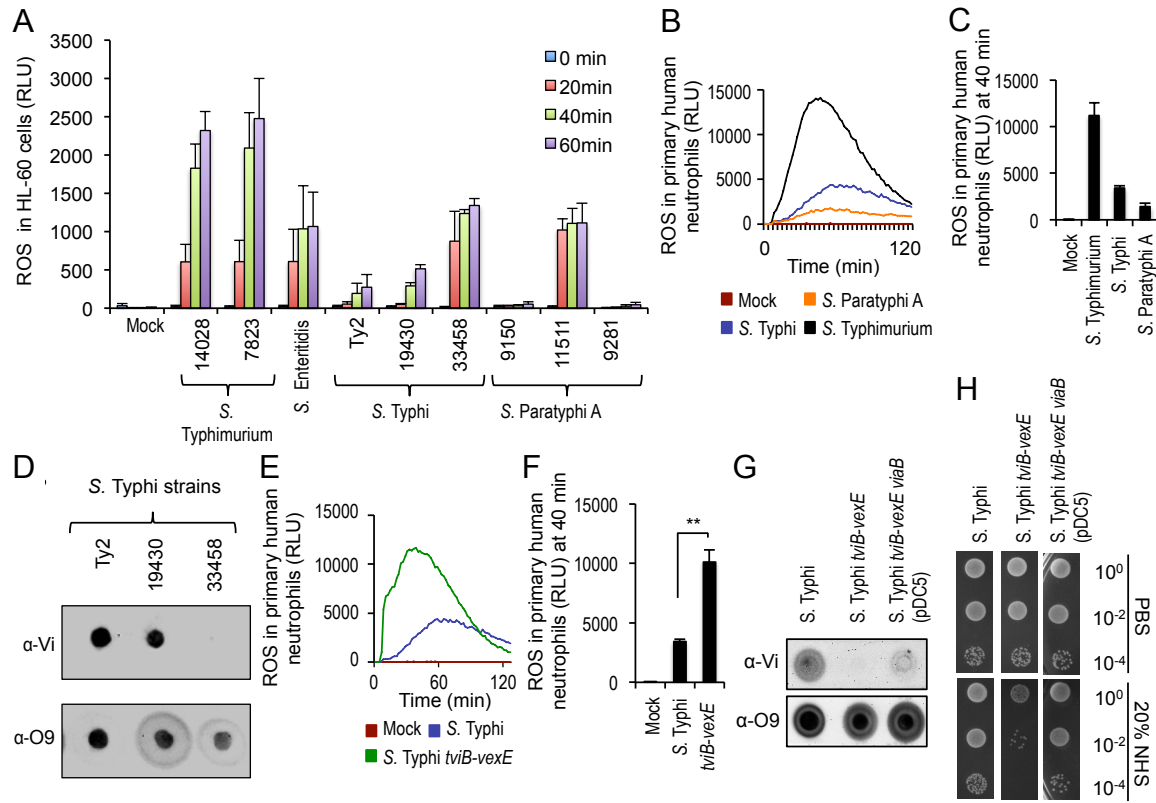

**Figure S1: Activation of the phagocyte respiratory burst by typhoidal and non-typhoidal *Salmonella* serovars, related to Figure 1.**

Human neutrophil-like (HL60) cells (A) or human primary neutrophils (B, C, E and F) were infected with the indicated opsonized bacterial strains and ROS production measured at the indicated time points using chemiluminescence ( $N = 3$ ). (B and E) Representative experiment showing generation of chemiluminescence over time. (C and F) Quantification of chemiluminescence at the indicated time point after infection. (D and G) The indicated bacterial strains were transferred onto a dot blot to detect production of the Vi-antigen ( $\alpha$ -Vi; top panel) or production of the O9-antigen ( $\alpha$ -O9; bottom panel). (H) Viability of the indicated bacterial strains incubated in PBS or 20% NHS was determined by spotting serial dilutions on agar plates. \*\*,  $P < 0.01$ .

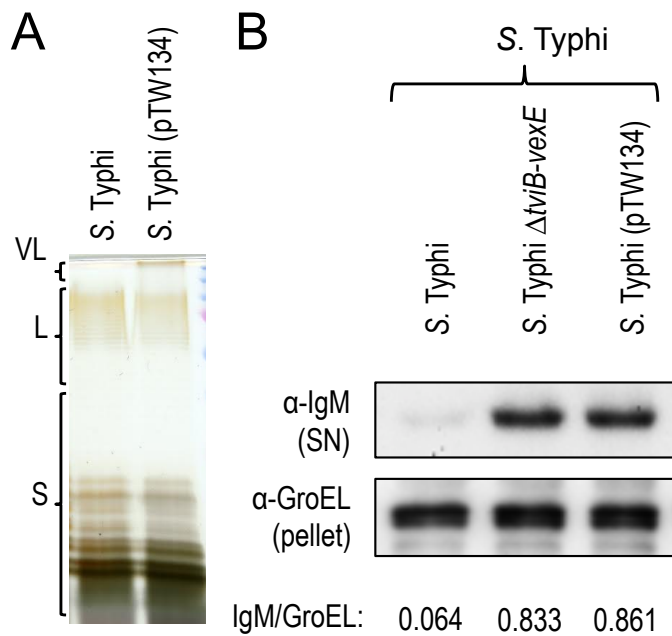

**Figure S2: Very-long O-antigen chains overcome capsule-mediated inhibition of IgM binding to the surface of *S. Typhi*, related to Figure 2.**

(A) LPS purified from the indicated bacterial strains was separated by SDS-PAGE and silver stained. VL, very-long O-antigen chains; L, long O-antigen chains; S, short O-antigen chains. (B) The indicated bacterial strains were incubated in human serum and surface bound proteins eluted with glycine. IgM eluted from the bacterial surface was detected by Western blot ( $\alpha$ -IgM; top panel). The bacterial protein GroEL was detected in the bacterial pellet ( $\alpha$ -GroEL; bottom panel) and used as a loading control by measuring the IgM/GroEL using densitometry.

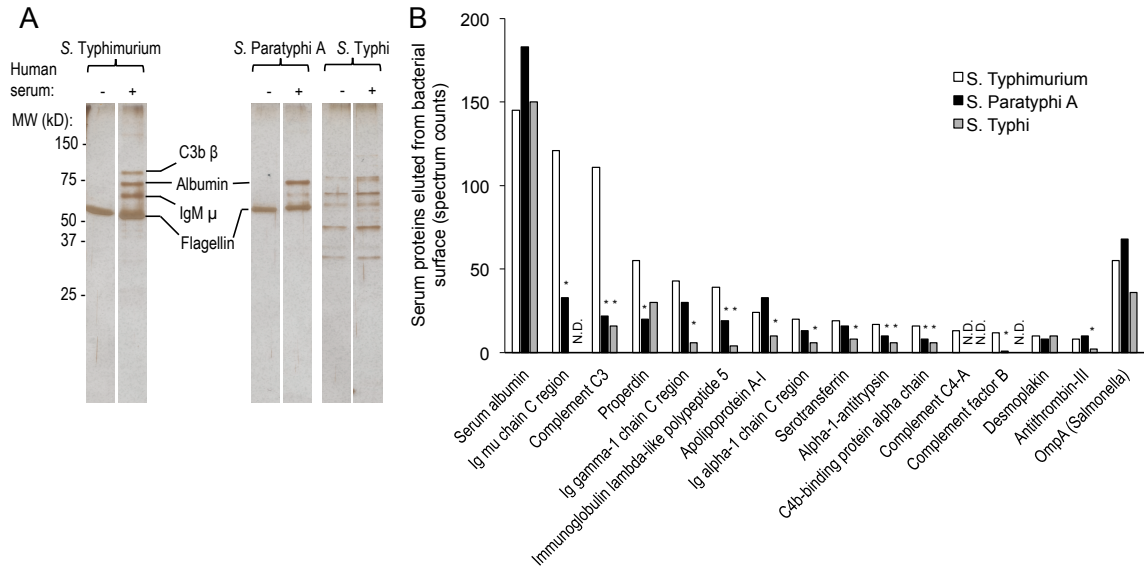

**Figure S3: Binding of serum proteins to the surface of *S. Typhimurium* and *S. Paratyphi A*, related to Figure 3.**

The indicated bacterial strains were incubated in human serum and surface bound proteins eluted with glycine. (A) Proteins eluted from the bacterial surface were separated by SDS-PAGE and silver stained. Molecular weight markers (MW) are shown on the left. (B) Proteins eluted from the bacterial surface were identified by MS analysis. \*, eluted proteins exhibiting a more than 2-fold change in abundance compared to *S. Typhimurium*; N.D., not detected.

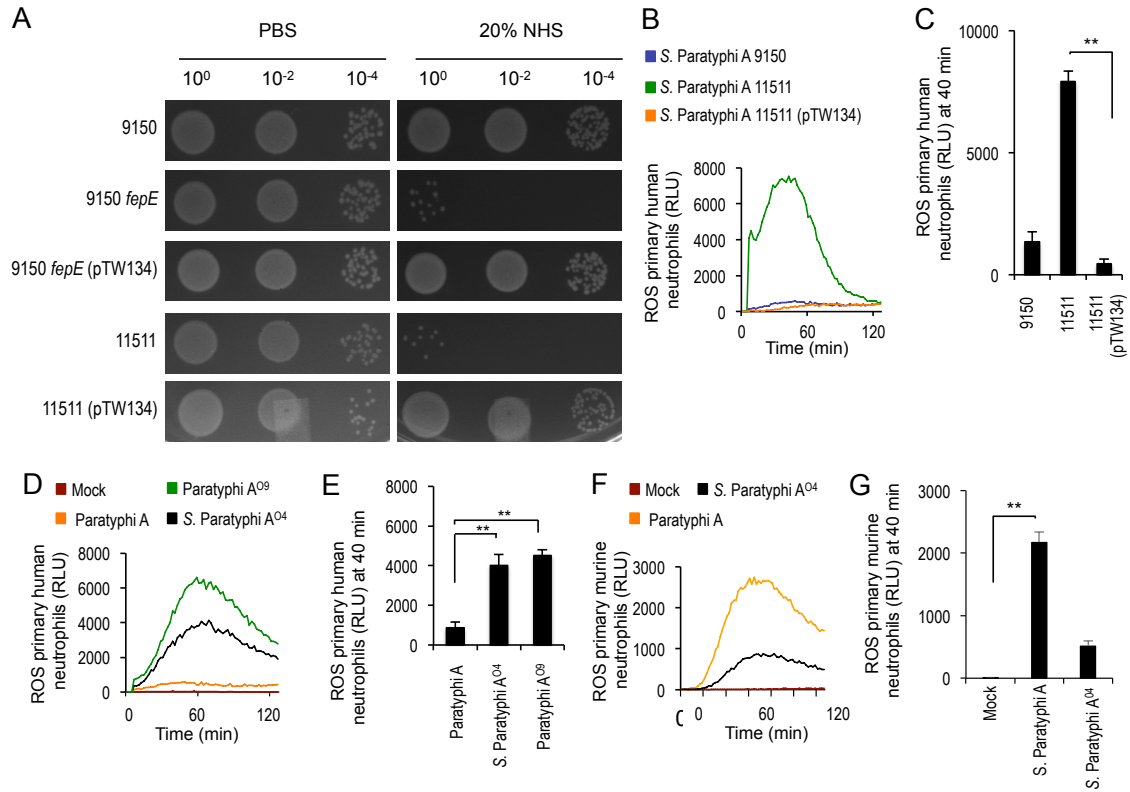

**Figure S4: Very-long O-antigen chains mediate serum resistance in *S. Paratyphi A*, related to Figures 3 and 5.**

(A) Viability of the indicated *S. Paratyphi A* strains was determined after incubation in buffer (PBS) or 20% normal human serum (NHS) by spotting serial dilutions on agar plates. Human primary neutrophils (B, C, D and E) or murine primary neutrophils (F and G) were infected with the indicated bacterial strains opsonized with human serum (B, C, D and E) or serum from germ-free mice (F and G) and ROS production measured at the indicated time points using chemiluminescence ( $N = 3$ ). (B, D and F) Representative experiment showing generation of chemiluminescence over time. (C, E and G) Quantification of chemiluminescence at the indicated time point after infection. \*\*,  $P < 0.01$ .

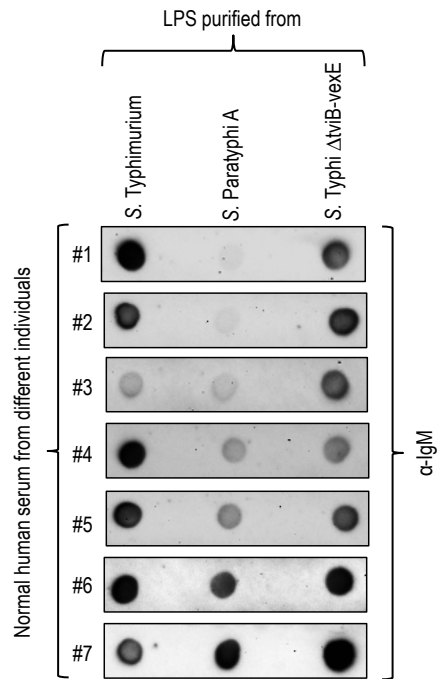

**Figure S5: LPS from *S. Paratyphi A* prevents IgM binding in a subset of normal human serum samples, related to Figure 2.**

LPS purified from the indicated bacterial strains was loaded on a dot blot to detect binding of IgM present in normal human serum ( $\alpha$ -IgM) from seven individuals (#1 - #7).

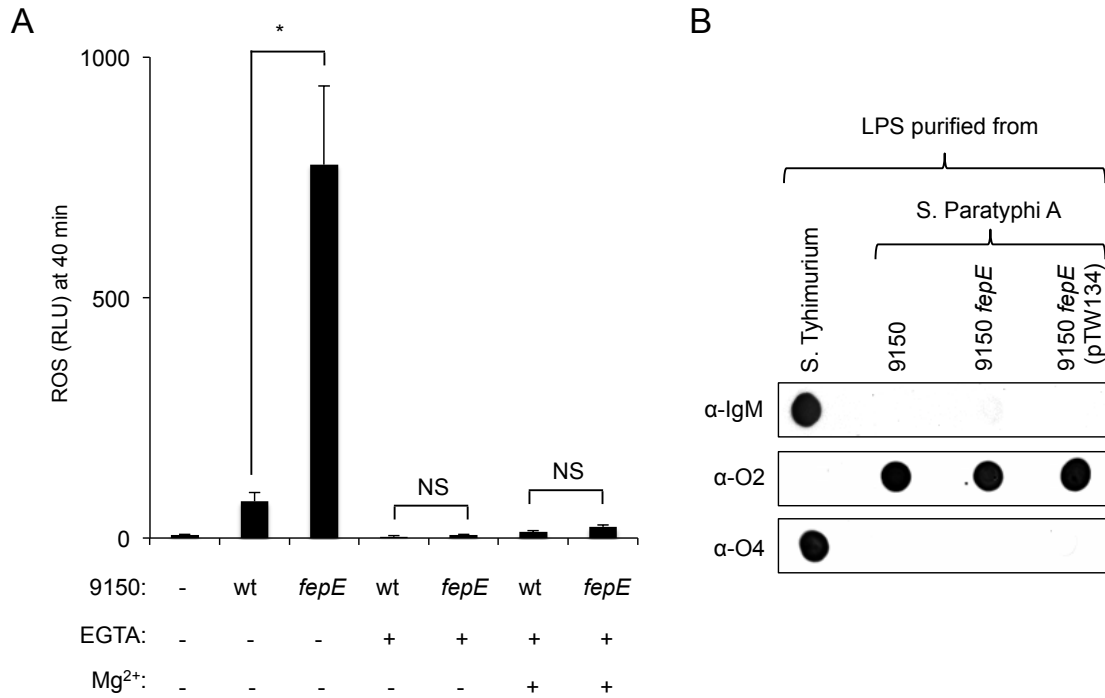

**Figure S6: Lack of very-long O-antigen chains in *S. Paratyphi A* activates the respiratory burst in neutrophil-like cells through antibody-mediated complement activation, related to Figure 6.**

(A) Human neutrophil-like (HL60) cells were infected with the indicated opsonized *S. Paratyphi A* strains and ROS production monitored over time using chemiluminescence. Chemiluminescence was quantified from three independent experiments at the indicated time point after infection. (B) LPS purified from the indicated bacterial strains was loaded on a dot blot to detect binding of IgM present in normal human serum ( $\alpha$ -IgM). \*,  $P < 0.05$ ; NS, not statistically significantly different.

**Supplementary table 1: Bacterial strains and plasmids used in this study**

| Strain designation    | Relevant characteristics/Genotype             | Source/Reference                        |
|-----------------------|-----------------------------------------------|-----------------------------------------|
| <i>S. Paratyphi A</i> |                                               |                                         |
| ATCC9150              | Wild type                                     | American type culture collection (ATCC) |
| ATCC11511             | var. Durazzo wild type                        | (Kauffmann and Silberstein, 1934)       |
| ATCC9281              | Wild type                                     | ATCC                                    |
| TWS110                | 9150 $\Delta rfbSE::rfbJ^{STM}$               | This study                              |
| TWS159                | 9150 $\Delta fepE::Km^R$                      | This study                              |
| HH121                 | 9150 $\Delta rfbE::Km^R$                      | This study                              |
| HH122                 | 9150 $\Delta rfbE::rfbE^{STY}$                | This study                              |
|                       |                                               |                                         |
| <i>S. Typhi</i>       |                                               |                                         |
| Ty2                   | wild-type strain, Vi+                         | ATCC                                    |
| ATCC19430             | wild-type strain, Vi+                         | ATCC                                    |
| ATCC33458             | wild-type strain, Vi-                         | ATCC                                    |
| SW74                  | Ty2 $\Delta tviB-vexE::Cm^R$                  | (Winter et al., 2008)                   |
|                       |                                               |                                         |
| <i>S. Enteritidis</i> |                                               |                                         |
| AJB72                 | CDC SSU7998 $Nal^R$ , wild type               | (Norris and Baumler, 1999)              |
|                       |                                               |                                         |
| <i>S. Typhimurium</i> |                                               |                                         |
| IR715                 | ATCC14028 $Nal^R$ , wild type                 | (Stojiljkovic et al., 1995)             |
| ATCC7823              | Wild type                                     | ATCC                                    |
|                       |                                               |                                         |
| <i>E. coli</i>        |                                               |                                         |
| S17 $\lambda$ pir     | C600::RP4 2-(Tet::Mu) (Km::Tn7) $\lambda$ pir | (Simon et al., 1983)                    |



|         |                                                                                                                             |                           |
|---------|-----------------------------------------------------------------------------------------------------------------------------|---------------------------|
| Plasmid |                                                                                                                             |                           |
| pTW76   | pRDH10:: <i>rfbHJ</i> <sup>STM</sup> :: <i>rfbX</i> <sup>SPA</sup>                                                          | This study                |
| pTW93   | Up-/downstream region of <i>rfbE</i> from SPA<br>9150 in pRDH10                                                             | This study                |
| pTW117  | KSAC cassette flanked by Up-/downstream<br>region of <i>fepE</i> from SPA9150 in pRDH10;<br>Cm <sup>R</sup> Km <sup>R</sup> | This study                |
| pTW126  | Up-/downstream region of <i>rfbE</i> from SPA<br>9150 in pRDH10                                                             | This study                |
| pTW128  | <i>fepE</i> <sup>SPA11511</sup> in PCR2.1 Carb <sup>R</sup>                                                                 | This study                |
| pTW131  | KSAC cassette flanked by Up-/downstream<br>region of <i>rfbE</i> from SPA9150 in pRDH10;<br>Cm <sup>R</sup> Km <sup>R</sup> | This study                |
| pTW134  | <i>fepE</i> <sup>SPA9150</sup> in pWSK29; Carb <sup>R</sup>                                                                 | This study                |
| pRDH10  | ori(R6K) <i>mobRP4 sacRB</i> Tet <sup>R</sup> CmR                                                                           | (Kingsley et al., 1999)   |
| pWSK29  | ori(pSC101) Carb <sup>R</sup>                                                                                               | (Wang and Kushner, 1991)  |
| pSW172  | ori(R101) <i>repA101ts</i> Carb <sup>R</sup>                                                                                | (Winter et al., 2013)     |
| pDC5    | ori(pSC101) Carb <sup>R</sup> , carrying cloned <i>viaB</i><br>locus                                                        | (Raffatellu et al., 2007) |

**Supplementary Table 2: Primers**

| Designation | Purpose                                                                          | Sequence (5'-3')                                       |
|-------------|----------------------------------------------------------------------------------|--------------------------------------------------------|
| 83          | Amplification of <i>S. Typhimurium rfbHJ</i>                                     | GCATAAGGGAGAGCGATGACAGCAAATAACCTGCGTG                  |
| 84          |                                                                                  | GCAGAAACATCATAACCGTTTCAGTAGTTCTTCAATTC                 |
| 85          | Amplification of <i>S. Paratyphi A 9150 rfbX</i>                                 | CGGTTATGATGTTTCTGCCCGCGAAAG                            |
| 86          |                                                                                  | TCTCAAGGGCATCGGTTATGCTAGCCTTTTACTCTTATACATATAATACTG    |
| 87          | Amplification of <i>S. Paratyphi A 9150 rfbSEX</i> in combination with primer 86 | GCATAAGGGAGAGCGATGAAAATTCTAATAATGGGAGCGTTTGG           |
| 133         | Amplification of <i>S. Paratyphi A 9150 fepE</i> flanking region 1 (upstream)    | CACACCCGTCCTGTGTGGCCGCGCAGCTAAGCC                      |
| 134         |                                                                                  | CGGGTAAAGGATCCGCCGTATGACCTGAAAACCTTATCC AATG           |
| 135         | Amplification of <i>S. Paratyphi A 9150 fepE</i> flanking region 2 (downstream)  | CATACGGCGGATCCTTTACCCGAAAAGCCGGATAGCG                  |
| 136         |                                                                                  | GCGTCCGGCGTAGAGCCAGTCGGCGCTGTGCGG                      |
| 137         | Amplification of <i>S. Paratyphi A 11511 fepE</i>                                | GCCTTATTTACCGCCATTGA                                   |
| 138         |                                                                                  | GCGCCGAAAGAGATTGTTAC                                   |
| 171         | Amplification of <i>S. Paratyphi A 9150 rfbE</i> flanking region 1 (upstream)    | GCGACCACACCCGTCCTGTGATGAAAATTCTAATAATGGGAGC            |
| 172         |                                                                                  | GCAGAAACATGGATCCTCATTTCCTTCCTCTTC                      |
| 173         | Amplification of <i>S. Paratyphi A 9150 rfbE</i> flanking region 2 (downstream)  | AGGGAAATGAGGATCCATGTTTCTGCCCGCGAAAAG                   |
| 174         |                                                                                  | ACGATGCGTCCGGCGTAGAGTTATGCTAGCCTTTTACTCTTATACATATAATAC |
| 179         | Amplification of <i>S. Paratyphi A 9150 fepE</i>                                 | GGCCCCCCTCGAGGGGATCCCACTGGCGCGTAAAGATTG                |
| 180         |                                                                                  | CGCTCTAGAACTAGTGGTCTGACTCAGACTAACCGTTCATCTATCG         |

**References for supplementary tables**

Kauffmann, F., and Silberstein, W. (1934). Untersuchungen über einige neue *Salmonella*-typen.

Zentralblatt für Bakteriologie, Parasitenkunde and Infektionskrankheiten 132, 431-437.

Kingsley, R.A., Reissbrodt, R., Rabsch, W., Ketley, J.M., Tsolis, R.M., Everest, P., Dougan, G., Baumler,

A.J., Roberts, M., and Williams, P.H. (1999). Ferrioxamine-mediated Iron(III) utilization by *Salmonella*

*enterica*. Appl Environ Microbiol 65, 1610-1618.

Norris, T.L., and Baumler, A.J. (1999). Phase variation of the *lpf* operon is a mechanism to evade cross-immunity between *Salmonella* serotypes. *Proc Natl Acad Sci U S A* *96*, 13393-13398.

Raffatellu, M., Santos, R.L., Chessa, D., Wilson, R.P., Winter, S.E., Rossetti, C.A., Lawhon, S.D., Chu, H., Lau, T., Bevins, C.L., *et al.* (2007). The capsule encoding the *viaB* locus reduces interleukin-17 expression and mucosal innate responses in the bovine intestinal mucosa during infection with *Salmonella enterica* serotype Typhi. *Infect Immun* *75*, 4342-4350.

Simon, R., Priefer, U., and Puhler, A. (1983). A broad host range mobilization system for in vivo genetic engineering: transposon mutagenesis in Gram-negative bacteria. *Bio/Technology* *1*, 784-791.

Stojiljkovic, I., Baumler, A.J., and Heffron, F. (1995). Ethanolamine utilization in *Salmonella typhimurium*: nucleotide sequence, protein expression, and mutational analysis of the *cchA cchB eutE eutJ eutG eutH* gene cluster. *J Bacteriol* *177*, 1357-1366.

Wang, R.F., and Kushner, S.R. (1991). Construction of versatile low-copy-number vectors for cloning, sequencing and gene expression in *Escherichia coli*. *Gene* *100*, 195-199.

Winter, S.E., Raffatellu, M., Wilson, R.P., Russmann, H., and Baumler, A.J. (2008). The *Salmonella enterica* serotype Typhi regulator *TviA* reduces interleukin-8 production in intestinal epithelial cells by repressing flagellin secretion. *Cell Microbiol* *10*, 247-261.

Winter, S.E., Winter, M.G., Xavier, M.N., Thiennimitr, P., Poon, V., Keestra, A.M., Laughlin, R.C., Gomez, G., Wu, J., Lawhon, S.D., *et al.* (2013). Host-derived nitrate boosts growth of *E. coli* in the inflamed gut. *Science* *339*, 708-711.
